# Supplementary material
Source: PubMed Central journal article supplement (PMC5097868)
Supplement: NIHMS822745-supplement-1.pdf [file NIHMS822745-supplement-1.pdf]

## **Supporting Information**

### **Structural Characterization of Serum N-Glycans by Methylamidation, Fluorescent Labeling, and Analysis by Microchip Electrophoresis**

Indranil Mitra, Christa M. Snyder, Xiaomei Zhou, Margit I. Campos, William R. Alley, Jr., Milos V. Novotny, and Stephen C. Jacobson

Department of Chemistry, Indiana University, Bloomington, Indiana 47405

Email: [jacobson@indiana.edu](mailto:jacobson@indiana.edu)

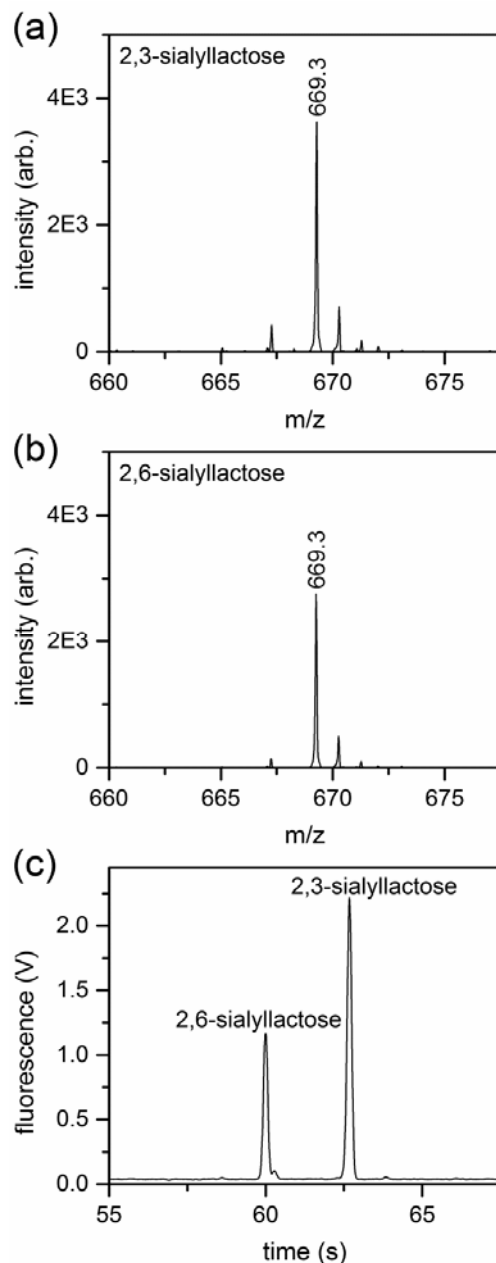

**Figure S1.** MALDI-MS spectra, acquired in positive-ion mode, of (a) 2,3-sialyllactose and (b) 2,6-sialyllactose neutralized by covalent derivatization with methylamine. (c) Electropherogram of a mixed sample of these linkage isomers. Reported MALDI-MS masses correspond to monosodium adducts  $[M+Na]^+$  of methylamidated 2,3-sialyllactose and 2,6-sialyllactose. Underivatized sialyllactose compounds, which were detected at  $m/z$  656.3, are not present in the spectra of the derivatized samples. For the electrophoretic separation, the electric field strength was 1250 V/cm, the separation length was 22 cm, and the samples were labeled with APTS. A few minor peaks were observed by both MS-based and electrophoretic-based methods and are most likely due to the presence of impurities in the sialyllactose samples.

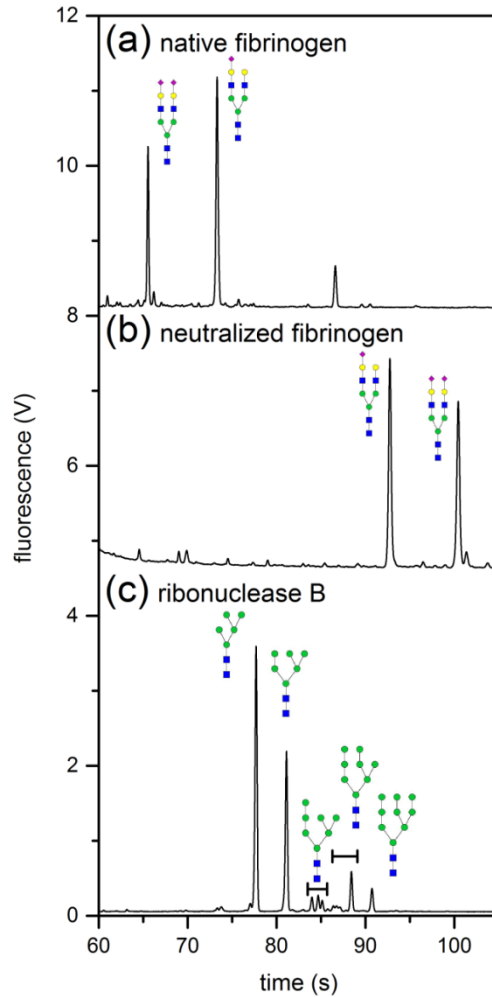

**Figure S2.** Electropherograms of (a) native and (b) methylamidated N-glycans derived from fibrinogen and (c) N-glycans derived from ribonuclease B that do not contain sialic acids. Symbols represent N-acetylglucosamine (blue square), mannose (green circle), galactose (yellow circle), and N-acetylneuraminic acid (purple diamond). The electric field strength was 1250 V/cm, the separation length was 22 cm, and the samples were labeled with APTS.

**Table S1.** N-Glycan structures, their amidated masses, relative intensities from MALDI-TOF-MS analysis, and relative peak areas from microchip electrophoresis (ME) for identified N-glycans. Peak areas from co-migrating structures in the electropherograms are reported as a single area. For comparison, MALDI intensities are reported for each individual mass and as a sum when structures co-migrate in the electropherograms. Rows marked in red correspond to N-glycans not identified in the electropherograms.

| structure                                                                           | amidated mass (Da) | MALDI-MS relative intensity (%) (individual) | MALDI-MS relative intensity (%) (summed) | ME relative peak area (%) (individual) | ME relative peak area (%) (summed) |
|-------------------------------------------------------------------------------------|--------------------|----------------------------------------------|------------------------------------------|----------------------------------------|------------------------------------|
| 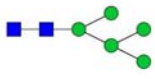   | 1234.4287          | 1.7952                                       |                                          | 1.6996                                 |                                    |
|    | 1396.4824          | 0.6828                                       |                                          | 1.3305                                 |                                    |
|    | 1437.5128          | 0.0180                                       | 0.0574                                   | --                                     | 0.5145                             |
|   | 1519.5575          | 0.0394                                       |                                          | --                                     |                                    |
|  | 1462.5121          | 2.8075                                       |                                          | 3.6424                                 |                                    |
|  | 1478.5394          | 0.1256                                       | 0.3407                                   | --                                     | 0.4875                             |
|  | 1665.6042          | 0.2152                                       |                                          | --                                     |                                    |
|  | 1558.5391          | 0.0288                                       | 0.1077                                   | --                                     | 0.3228                             |
|  | 1681.6187          | 0.0789                                       |                                          | --                                     |                                    |
|  | 1579.5654          | 0.5864                                       |                                          | N/A                                    |                                    |
|  | 1599.5656          | 0.0152                                       |                                          | N/A                                    |                                    |

|                                                                                     |           |         |         |        |         |
|-------------------------------------------------------------------------------------|-----------|---------|---------|--------|---------|
| 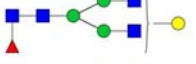   | 1624.5791 | 4.474   |         | --     |         |
|    | 1720.5919 | 0.0429  | 5.2268  | --     | 5.2115  |
|    | 1827.6766 | 0.5503  |         | --     |         |
|    | 1843.6715 | 0.1598  |         | --     |         |
|    | 1640.5922 | 0.2474  |         | 2.0406 |         |
|    | 1741.6875 | 0.1023  |         | 0.5058 |         |
|    | 1782.7179 | 0.2858  |         | 0.7217 |         |
|    | 1786.6501 | 1.7893  | 1.8270  | --     | 3.5238  |
|    | 1882.6447 | 0.0378  |         | --     |         |
|  | 1903.6710 | 0.0529  |         | N/A    |         |
|  | 1928.7027 | 0.2402  | 11.7076 | --     | 7.8300  |
|  | 1944.6976 | 11.4673 |         | --     |         |
|  | 1989.7295 | 0.2101  |         | 1.0219 |         |
|  | 2090.7644 | 3.7959  |         | 4.5428 |         |
|  | 2131.7820 | 0.0676  |         | N/A    |         |
|  | 2147.7770 | 1.4416  |         | 0.9003 |         |
|  | 2248.7964 | 56.0153 | 56.0704 | --     | 33.8128 |
|  | 2451.9680 | 0.0551  |         | --     |         |

|                                                                                     |           |        |        |                                 |        |
|-------------------------------------------------------------------------------------|-----------|--------|--------|---------------------------------|--------|
| 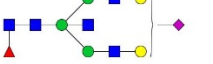   | 2293.7832 | 1.6307 |        | 3.0739                          |        |
|    | 2309.8297 | 0.3143 |        | 0.5288                          |        |
|    | 2394.8918 | 3.8949 | 4.9940 | --                              | 8.1444 |
|    | 2597.9403 | 1.0991 |        | --                              |        |
|    | 2455.8877 | 0.0494 |        | N/A                             |        |
|    | 2613.9392 | 0.7909 |        | 2.9976                          |        |
|    | 2759.9602 | 0.0174 |        | N/A<br>(insufficient intensity) |        |
|  | 2743.9982 | 0.0917 |        | N/A                             |        |
|  | 2918.0605 | 3.9507 |        | 6.7570                          |        |
|  | 2979.0674 | 0.0425 |        | N/A                             |        |
|  | 3064.0583 | 0.5014 |        | 1.6419                          |        |
|  | 3125.1253 | 0.0244 |        | N/A                             |        |
|  | 3210.1564 | 0.0246 |        | N/A                             |        |

|                                                                                   |           |        |  |                                 |  |
|-----------------------------------------------------------------------------------|-----------|--------|--|---------------------------------|--|
| 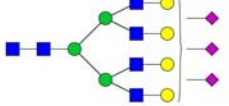 | 3283.1728 | 0.0380 |  | N/A<br>(insufficient intensity) |  |
|  | 3429.2307 | 0.0287 |  | N/A<br>(insufficient intensity) |  |
|  | 3587.2822 | 0.0390 |  | N/A<br>(insufficient intensity) |  |
|  | 3733.3496 | 0.0335 |  | N/A<br>(insufficient intensity) |  |

**Table S2.** Equations fitted to the data in **Figure 3** and their  $R^2$  values. Fits were used to estimate electrophoretic mobilities of unknown N-glycans that did not have a corresponding standard N-glycan.

| category of structures                 | equation<br>(x = molar mass, y = mobility) |
|----------------------------------------|--------------------------------------------|
| bisected, bi-antennary                 | $y = -4.84E-08x + 2.79E-04, R^2 = 0.9859$  |
| non-bisected, bi-antennary             | $y = -5.04E-08x + 2.75E-04, R^2 = 0.9888$  |
| non-bisected, tri- and tetra-antennary | $y = -2.58E-08x + 2.18E-04, R^2 = 0.9883$  |
